# Supplementary material for: Description of Peripheral Blood Perfusion by Laser Speckle Contrast Analysis (LASCA) in ‘Early’ versus ‘Clinically Overt’ Systemic Sclerosis in Routine Clinics
Source: MDPI journal article supplement (doi:10.3390/diagnostics13091566), 2023-04-27
Supplement: s1 [file s1]

# Supplementary File

**Table S1.** Baseline characteristics of the 'early' SSc group (n = 20).

| Baseline characteristics of the 'early' SSc group             |           |
|---------------------------------------------------------------|-----------|
| Raynaud's phenomenon, n (%)                                   | 20 (100)  |
| Puffy fingers, n (%)                                          | 7 (35.0)  |
| NVC scleroderma pattern, n (%)                                | 17 (85.0) |
| SSc-specific Ab, n (%)                                        | 7 (35.0)  |
| Anticentromere Ab, n (%)                                      | 4 (20.0)  |
| Anti-topoisomerase-1 Ab, n (%)                                | 2 (10.0)  |
| Anti-RNA-polymerase III Ab, n (%)                             | 1 (5.0)   |
| Inclusion criteria 'early' SSc as defined by LeRoy (2001) (8) |           |
| No scleroderma pattern + SSc specific Ab, n (%)               | 3 (15.0)  |
| Scleroderma pattern + no SSc specific Ab, n (%)               | 13 (65.0) |
| Scleroderma pattern + SSc specific Ab, n (%)                  | 4 (20.0)  |
| Total, n (%)                                                  | 20 (100)  |

Ab: antibody; Early: 'early' systemic sclerosis (limited systemic sclerosis); NVC: nailfold videocapillaroscopy; SSc: systemic sclerosis.
